# Supplementary material for: A cultural atlas of vocal variation: yellow-naped amazons exhibit contact call dialects throughout their Mesoamerican range
Source: Frontiers journal article supplement (doi:10.3389/fbirs.2023.1266420), 2023-11-17
Supplement: downloadfile [file 1266420]

## Supplementary Figures

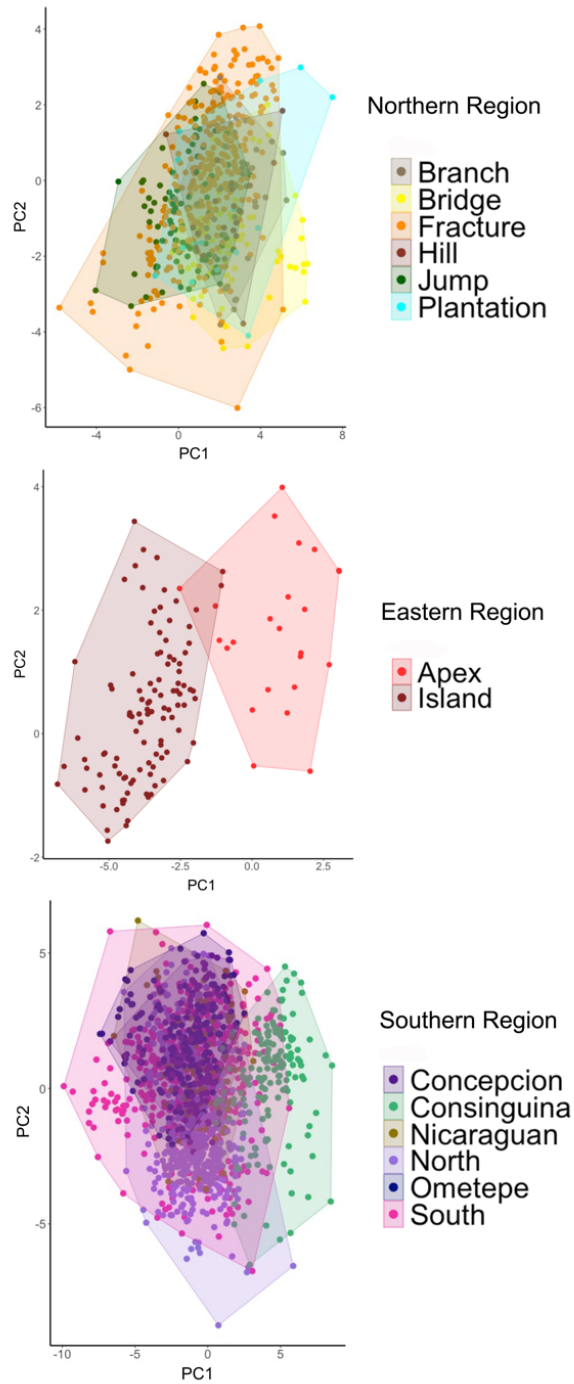

**Supplementary Fig. 1.** Figures showing PCA results sorted regionally (Northern = Mexico and Guatemala, Eastern = Honduras, Southern = Nicaragua and Costa Rica).

## Comparison of Call Types with Good Statistical Separation

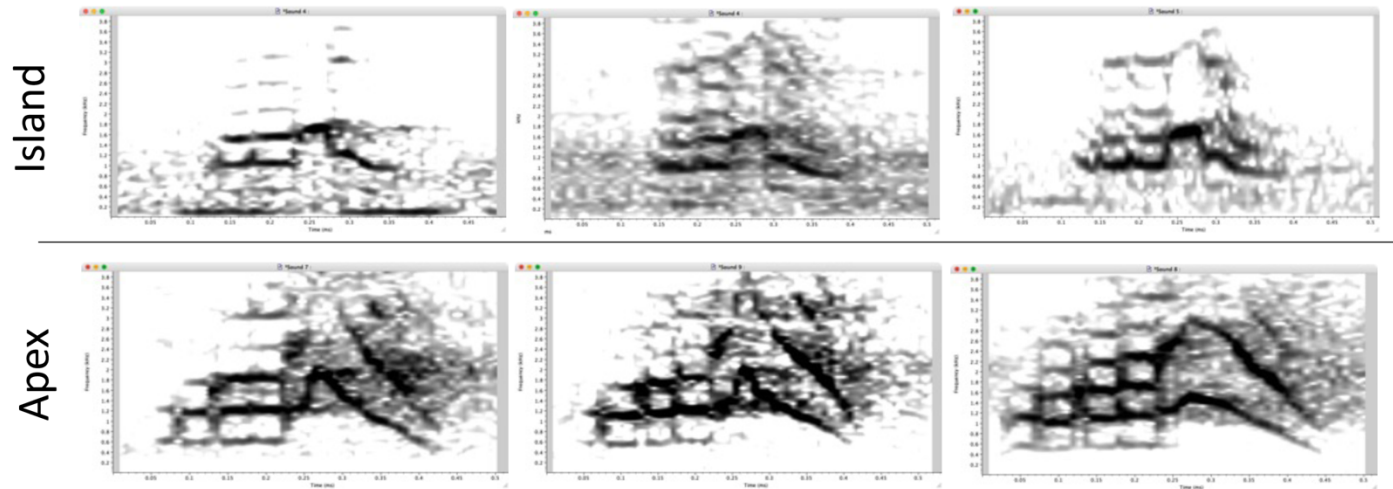

## Comparison of Call Types with Poor Statistical Separation

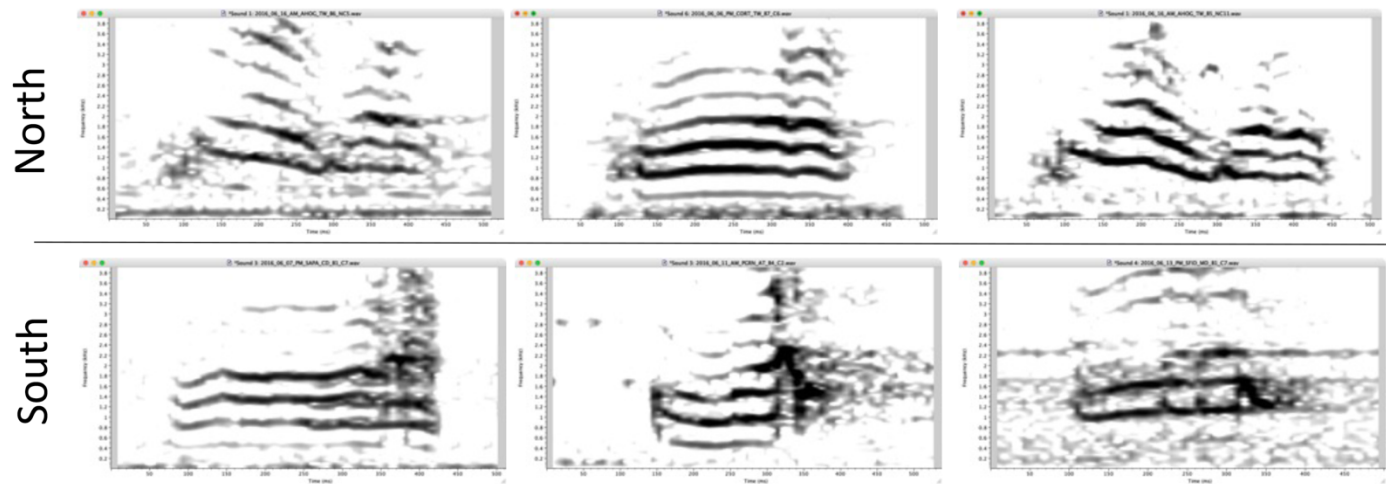

**Supplemental Figure 2.** A figure showing a comparison of two call types that were statistically distinguishable (Island and Apex), and two call types that were not statistically distinguishable (North and South). All calls are depicted using the same time and frequency axes.

## Supplementary Tables

**Supplementary Table 1.** A comprehensive list of all 47 sites where yellow-naped amazons were recorded. Site names with an asterisk\* were removed from the dataset after initial processing because they had fewer than 3 birds. The column “Average number of calls per bird” was calculated by dividing the number of calls included in analysis by the number of birds included in analysis.

| Site Name            | Country    | Year | Number of birds isolated from field recordings | Number of birds included in analysis | Number of calls isolated from field recordings | Number of calls included in analysis | Average number of calls per bird | Number of calls excluded from analysis |
|----------------------|------------|------|------------------------------------------------|--------------------------------------|------------------------------------------------|--------------------------------------|----------------------------------|----------------------------------------|
| Cuajiniquil          | Costa Rica | 2016 | 8                                              | 8                                    | 68                                             | 68                                   | 9                                | 0                                      |
| Curu                 | Costa Rica | 2016 | 4                                              | 4                                    | 41                                             | 41                                   | 10                               | 0                                      |
| Enseñada*            | Costa Rica | 2016 | 2                                              | -                                    | 19                                             | 0                                    | -                                | 19                                     |
| Finca Ahogados       | Costa Rica | 2016 | 6                                              | 6                                    | 48                                             | 48                                   | 8                                | 0                                      |
| Hacienda Inocentes   | Costa Rica | 2016 | 7                                              | 6                                    | 57                                             | 54                                   | 9                                | 3                                      |
| Horizontes           | Costa Rica | 2016 | 3                                              | 3                                    | 22                                             | 22                                   | 7                                | 0                                      |
| Las Trancas          | Costa Rica | 2016 | 6                                              | 6                                    | 44                                             | 44                                   | 7                                | 0                                      |
| Murcielago           | Costa Rica | 2016 | 7                                              | 7                                    | 54                                             | 54                                   | 8                                | 0                                      |
| Palenque             | Costa Rica | 2016 | 8                                              | 4                                    | 49                                             | 43                                   | 11                               | 6                                      |
| Palo Verde*          | Costa Rica | 2016 | 2                                              | -                                    | 21                                             | 0                                    | -                                | 21                                     |
| Parcelas Santa Elena | Costa Rica | 2016 | 7                                              | 7                                    | 78                                             | 78                                   | 11                               | 0                                      |
| Pelon Altura         | Costa Rica | 2016 | 8                                              | 8                                    | 83                                             | 83                                   | 10                               | 0                                      |
| Pelon Bajura*        | Costa Rica | 2016 | 2                                              | -                                    | 23                                             | 0                                    |                                  | 23                                     |
| Peñas Blancas        | Costa Rica | 2016 | 6                                              | 6                                    | 76                                             | 76                                   | 13                               | 0                                      |
| Playa Cabuyal        | Costa Rica | 2016 | 7                                              | 7                                    | 61                                             | 61                                   | 9                                | 0                                      |
| Playa Grande         | Costa Rica | 2016 | 7                                              | 7                                    | 63                                             | 63                                   | 9                                | 0                                      |
| Puerto San Pablo     | Costa Rica | 2016 | 7                                              | 6                                    | 51                                             | 49                                   | 8                                | 2                                      |
| San Fidel            | Costa Rica | 2016 | 4                                              | 4                                    | 38                                             | 38                                   | 10                               | 0                                      |
| Santa Rosa           | Costa Rica | 2016 | 3                                              | 3                                    | 26                                             | 26                                   | 9                                | 0                                      |
| Taboga-Cortijo       | Costa Rica | 2016 | 6                                              | 6                                    | 64                                             | 64                                   | 11                               | 0                                      |

|                            |            |      |    |    |     |     |    |    |
|----------------------------|------------|------|----|----|-----|-----|----|----|
| Tarcoles                   | Costa Rica | 2016 | 3  | 3  | 31  | 31  | 10 | 0  |
| Tivives                    | Costa Rica | 2016 | 9  | 8  | 63  | 61  | 8  | 2  |
| Argentina                  | Nicaragua  | 2016 | 5  | 4  | 47  | 40  | 10 | 7  |
| Escamequita                | Nicaragua  | 2016 | 10 | 10 | 100 | 94  | 9  | 6  |
| La Guinea                  | Nicaragua  | 2016 | 3  | 3  | 57  | 36  | 12 | 21 |
| La Piscina                 | Nicaragua  | 2016 | 3  | 3  | 35  | 34  | 11 | 1  |
| Los Placeres               | Nicaragua  | 2016 | 8  | 8  | 91  | 84  | 11 | 7  |
| Merida                     | Nicaragua  | 2016 | 9  | 8  | 83  | 83  | 10 | 0  |
| Peña Inculca               | Nicaragua  | 2016 | 9  | 6  | 86  | 49  | 8  | 37 |
| Pul                        | Nicaragua  | 2016 | 9  | 9  | 93  | 63  | 7  | 30 |
| San Ramone                 | Nicaragua  | 2016 | 5  | 5  | 55  | 55  | 11 | 0  |
| Aztlan site 1              | Mexico     | 2018 | 6  | 3  | 25  | 17  | 6  | 8  |
| Aztlan site 2              | Mexico     | 2018 | 3  | 3  | 18  | 18  | 6  | 0  |
| Aztlan site 3              | Mexico     | 2018 | 4  | 4  | 44  | 42  | 11 | 2  |
| Las Brisas de Hueyate      | Mexico     | 2018 | 6  | 6  | 110 | 107 | 18 | 3  |
| Ponte Duro                 | Mexico     | 2018 | 5  | 3  | 51  | 48  | 16 | 3  |
| Rancho el Piñon            | Mexico     | 2018 | 4  | 3  | 30  | 28  | 9  | 2  |
| Roberto Barrios Mapastapec | Mexico     | 2018 | 8  | 8  | 112 | 105 | 13 | 7  |
| Salto de Agua              | Mexico     | 2018 | 3  | 3  | 48  | 41  | 14 | 7  |
| Aztlan Town Roost          | Mexico     | 2019 | 7  | 6  | 17  | 58  | 10 | 2  |
| Las Palmas                 | Mexico     | 2019 | 6  | 6  | 24  | 80  | 13 | 0  |
| Los Tarrales               | Guatemala  | 2019 | 4  | 3  | 59  | 15  | 5  | 2  |
| Pineapple Plantation       | Guatemala  | 2019 | 6  | 3  | 25  | 20  | 7  | 4  |
| Guava Grove                | Honduras   | 2019 | 6  | 6  | 50  | 59  | 10 | 0  |
| Port Royal National Park   | Honduras   | 2019 | 3  | 3  | 86  | 24  | 8  | 1  |
| Sandy Bay                  | Honduras   | 2019 | 6  | 5  | 60  | 48  | 10 | 2  |
| Undisclosed                |            |      |    |    | 80  |     |    |    |



**Supplementary Table 2.** A factor loading table showing the 26 acoustic parameters examined in our PCA, and the first 5 principal components from the analysis. Detailed descriptions of each acoustic parameter can be found in the RDocumentation for the function `specan` in the `warbleR` package (version 1.1.9). \*Spectral entropy is a product of time and spectral entropy (Araya-Salas & Smith-Vidaurre, 2017).

| <i>Variable</i>                 | <i>PC1</i> | <i>PC2</i> | <i>PC3</i> | <i>PC4</i> | <i>PC5</i> |
|---------------------------------|------------|------------|------------|------------|------------|
| duration                        | 0.2711     | -0.2954    | 0.0804     | -0.0535    | 0.054      |
| mean frequency                  | 0.2774     | 0.297      | -0.0336    | -0.0661    | 0.029      |
| standard deviation of frequency | 0.1399     | 0.0003     | -0.1991    | 0.1831     | -0.4798    |
| median frequency                | 0.2525     | 0.2975     | -0.0089    | -0.0687    | 0.0782     |
| first quartile frequency        | 0.2232     | 0.2861     | 0.0559     | -0.1454    | 0.2236     |
| third quartile frequency        | 0.2763     | 0.2491     | -0.0966    | 0.0191     | -0.1752    |
| interquartile frequency         | 0.1039     | -0.0027    | -0.1884    | 0.1898     | -0.4805    |
| median time                     | 0.2749     | -0.2596    | 0.102      | 0.0313     | 0.0795     |
| first quartile time             | 0.2671     | -0.1909    | 0.1174     | 0.1007     | 0.1257     |
| third quartile time             | 0.2723     | -0.303     | 0.0828     | -0.017     | 0.064      |
| interquartile time              | 0.2142     | -0.3205    | 0.0372     | -0.1041    | 0.0016     |
| skewness                        | 0.0474     | 0.0353     | 0.3741     | 0.089      | -0.3078    |
| kurtosis                        | 0.0507     | 0.0174     | 0.3321     | 0.1        | -0.3091    |
| spectral entropy                | 0.0593     | -0.1274    | -0.4383    | -0.0451    | 0.096      |
| time entropy                    | -0.2533    | 0.2554     | -0.065     | 0.0093     | -0.0132    |
| spectral entropy*               | -0.0048    | -0.0626    | -0.4575    | -0.0431    | 0.0928     |
| spectral flatness               | 0.0349     | -0.102     | -0.4205    | -0.0155    | -0.0311    |
| average of dominant frequency   | 0.2915     | 0.2347     | 0.0001     | -0.1167    | 0.0616     |
| minimum of dominant frequency   | -0.0166    | 0.0782     | 0.0107     | -0.4566    | -0.1565    |
| maximum of dominant frequency   | 0.2645     | 0.1482     | -0.1355    | 0.083      | -0.1327    |
| range of dominant frequency     | 0.2198     | 0.0672     | -0.114     | 0.3577     | -0.0049    |
| modulation index                | 0.1861     | -0.2028    | -0.0316    | -0.1444    | -0.0135    |
| dominant frequency at start     | 0.0351     | 0.0132     | 0.0042     | -0.4881    | -0.2183    |
| dominant frequency at end       | 0.0818     | 0.0999     | 0.0555     | 0.141      | 0.1339     |
| slope of change                 | -0.0063    | 0.0956     | 0.0302     | 0.4559     | 0.2551     |
| mean peak frequency             | 0.2059     | 0.2197     | 0.0553     | -0.0936    | 0.1902     |
| <i>% variation explained</i>    | 26.7       | 17.6       | 15.98      | 8.707      | 8.412      |
| <i>cumulative variation</i>     | 26.7       | 44.3       | 60.28      | 68.987     | 77.399     |

**Supplementary Table 3.** P-values generated from Tukey post-hoc tests on the ANOVA for PC1 and PC2. Significant p-values are in bold. All values greater than 0.001 were standardized to three significant decimal figures.

|                                              |                     | Tukey test p-values on ANOVA values from PC1 |               |               |                   |                     |                 |             |               |             |                   |              |                |                   |              |
|----------------------------------------------|---------------------|----------------------------------------------|---------------|---------------|-------------------|---------------------|-----------------|-------------|---------------|-------------|-------------------|--------------|----------------|-------------------|--------------|
|                                              |                     | <i>Apex</i>                                  | <i>Branch</i> | <i>Bridge</i> | <i>Concepcion</i> | <i>Consianguina</i> | <i>Fracture</i> | <i>Hill</i> | <i>Island</i> | <i>Jump</i> | <i>Nicaraguan</i> | <i>North</i> | <i>Ometepe</i> | <i>Plantation</i> | <i>South</i> |
| Tukey test p-values on ANOVA values from PC2 | <i>Apex</i>         | -                                            | 0.937         | 0.906         | < .001            | < .001              | < .001          | 1.00        | < .001        | < .001      | < .001            | < .001       | < .001         | 1.00              | < .001       |
|                                              | <i>Branch</i>       | 0.131                                        | -             | 1.00          | < .001            | < .001              | < .001          | 0.998       | < .001        | < .001      | < .001            | < .001       | < .001         | 1.00              | < .001       |
|                                              | <i>Bridge</i>       | < .001                                       | 0.258         | -             | < .001            | < .001              | < .001          | 0.999       | < .001        | < .001      | < .001            | < .001       | < .001         | 1.00              | < .001       |
|                                              | <i>Concepcion</i>   | 0.00236                                      | < .001        | < .001        | -                 | < .001              | < .001          | < .001      | < .001        | < .001      | 0.998             | 1.00         | 0.0250         | < .001            | 1.00         |
|                                              | <i>Consianguina</i> | 1.000                                        | 0.360         | < .001        | < .001            | -                   | < .001          | < .001      | < .001        | < .001      | < .001            | < .001       | < .001         | 0.00350           | < .001       |
|                                              | <i>Fracture</i>     | 0.758                                        | 0.763         | < .001        | < .001            | 0.994               | -               | 0.698       | < .001        | < .001      | < .001            | < .001       | < .001         | 0.875             | < .001       |
|                                              | <i>Hill</i>         | 0.282                                        | 1.00          | 0.915         | < .001            | 0.533               | 0.834           | -           | < .001        | 0.00156     | < .001            | < .001       | < .001         | 1.00              | < .001       |
|                                              | <i>Island</i>       | 1.00                                         | 0.278         | < .001        | < .001            | 1.00                | 0.971           | 0.438       | -             | < .001      | < .001            | < .001       | < .001         | < .001            | < .001       |
|                                              | <i>Jump</i>         | < .001                                       | 0.999         | 0.626         | < .001            | < .001              | 0.00132         | 1.00        | < .001        | -           | 0.0603            | < .001       | < .001         | 0.0122            | < .001       |
|                                              | <i>Nicaraguan</i>   | 0.990                                        | 0.00653       | < .001        | 0.276             | 0.633               | 0.0346          | 0.0428      | 0.917         | < .001      | -                 | 0.943        | < .001         | < .001            | 0.743        |
|                                              | <i>North</i>        | < .001                                       | 0.457         | 0.998         | < .001            | < .001              | < .001          | 0.992       | < .001        | 0.870       | < .001            | -            | < .001         | < .001            | 1.00         |
|                                              | <i>Ometepe</i>      | < .001                                       | < .001        | < .001        | 1.00              | < .001              | < .001          | < .001      | < .001        | < .001      | 0.0331            | < .001       | -              | < .001            | 0.00335      |
|                                              | <i>Plantation</i>   | 0.558                                        | 1.00          | 0.947         | 0.00121           | 0.793               | 0.957           | 1.00        | 0.711         | 1.00        | 0.164             | 0.995        | < .001         | -                 | < .001       |
|                                              | <i>South</i>        | 1.00                                         | 0.0717        | < .001        | < .001            | 1.00                | 0.242           | 0.249       | 1.00          | < .001      | 0.838             | < .001       | < .001         | 0.549             | -            |

## References

Araya-Salas, M. and Smith-Vidaurre, G. (2017), *warbleR: an r package to streamline analysis of animal acoustic signals*. *Methods Ecol Evol.* 8, 184-191.
